# Supplementary material for: The influence of the Japanese waving cat on the joint spatial compatibility effect: A replication and extension of Dolk, Hommel, Prinz, and Liepelt (2013)
Source: PubMed Central journal article supplement (PMC5599021; doi:10.1371/journal.pone.0184844), 2017-09-14
Supplement: pone.0184844.s003.pdf [file pone.0184844.s003.pdf]

## **S1 Appendix. Detailed information of distributional RT analyses for Experiment 1 and 2.**

It has been discussed elsewhere that SCEs differ in their temporal dynamics depending on task modality (for an overview see [37]). Therefore, we conducted a distributional reaction time (RT) analysis to gain insight whether temporal dynamics contribute to the differences in our results pattern. A delta plot was calculated per task modality [38, 39, 40], that reveals the magnitude of SCEs at five RT bins (quintiles). More specifically, it depicts the difference between two RT distributions across RT bins on the y-axis (i.e., the difference of RT distributions of compatible and incompatible trials, thus revealing joint SCE), as a function of the average of both RT distributions across RT bins (on the x-axis). The slope of the delta plot accounts for RT differences between compatible and incompatible trials (i.e. joint SCE) across response time. A positive slope indicates the joint SCE to be larger for slower responses, whereas a negative slope indicates joint SCE to be larger for faster responses. As can be seen in Fig 2 below, mean RTs differ between both experiments with a slow response speed for the auditory joint go/no-go Simon task (Fig 2A, upper panel) compared to fast responses in the visual joint go/no-go Simon task (Fig 2B, lower panel). This difference in reaction times depending on task modality was likewise reported by Lien, Pedersen, and Proctor [29] (averaged reaction times reported for go/ no-go conditions with the cat being present:  $M_{\text{auditory}} = 468$  ms,  $SD_{\text{auditory}} = 26$ ;  $M_{\text{visual}} = 371$  ms,  $SD_{\text{visual}} = 22$ ), indicating that processing and/or response reaction is slower for auditory Simon stimulus material compared to visual stimuli.

Descriptively, a flat positive slope occurred for both task modalities. However, there was no evidence for a significant effect of RT bins on the magnitude of the joint SCE in neither auditory joint go/no-go task,  $F(1.406, 125.136) = .35$ ,  $p = .627$ ,  $\varepsilon = .35$ , nor the visual go/no-go task,  $F(1.507, 137.159) = .93$ ,  $p = .373$ ,  $\varepsilon = .38$ . These results diverge from the typical pattern discussed in the literature (see [37] for more details). As such, SCEs in auditory joint go/no-go Simon tasks increase with increasing response reactions, whereas SCEs in visual joint go/no-go Simon tasks usually decrease with increasing reaction times. Note however, that our joint SCEs as a function of mean RT only ranged between 2 ms and 5 ms (Experiment 1, see Fig 2A) and -2 ms and 1 ms (Experiment 2; see Fig 2B), and so it is not surprising that there is no effect of RT bins on these relatively small SCEs.

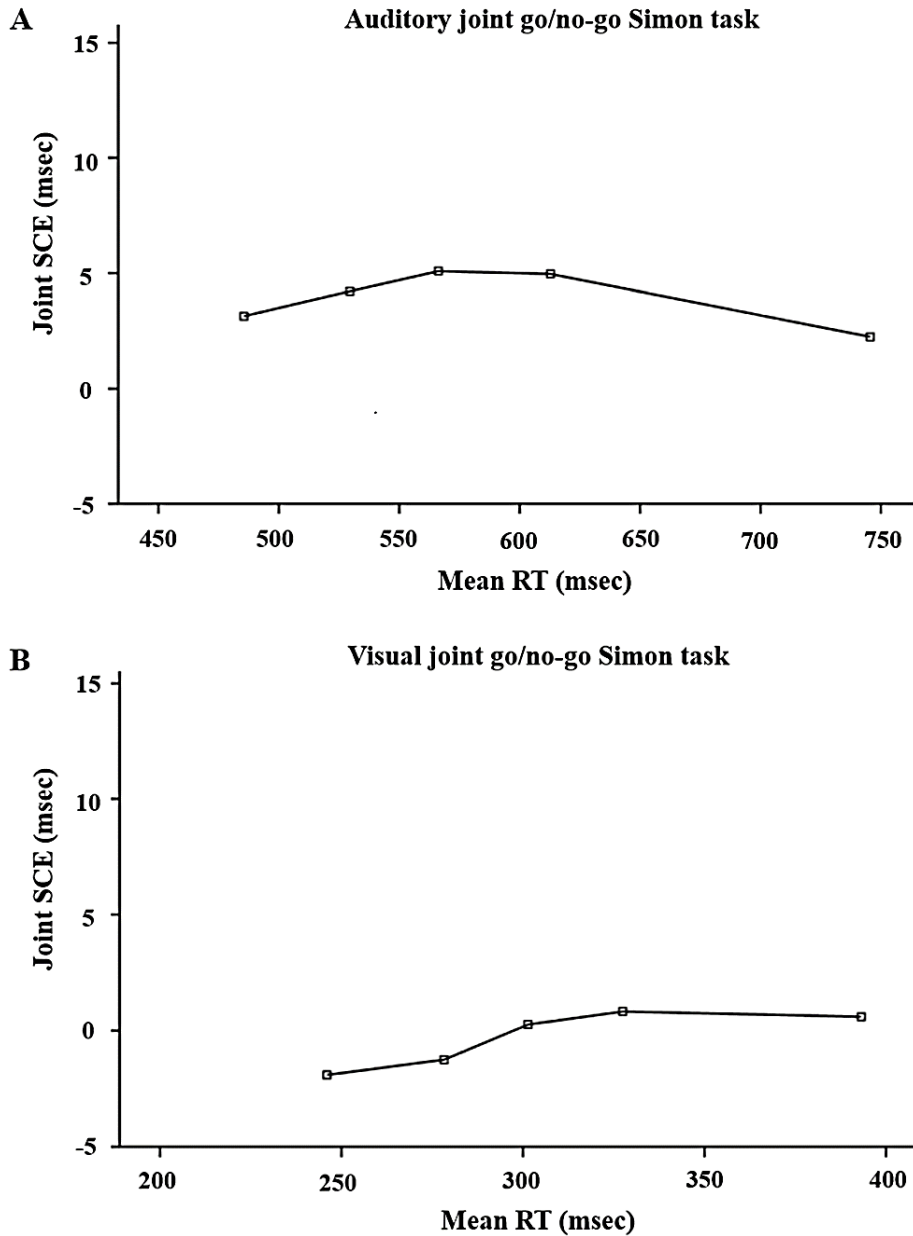

**Fig 2. Delta plot for the auditory and visual joint go/no-go Simon task modality.** Joint SCEs are depicted as a function of mean reaction times per RT bins (quintiles) in A (upper panel) for the auditory joint go/no-go Simon task (Experiment 1) and in B (lower panel) for the visual joint go/no-go Simon task (Experiment 2).
